# Supplementary material for: Hollow nanostructured NiO particles as an efficient electrode material for lithium-ion energy storage properties
Source: Royal Society of Chemistry journal article supplement (doi:10.1039/d3ra03467d), 2023-01-01
Supplement: d3ra03467d1.pdf [file d3ra03467d1.pdf]

## Supporting Information

### Hollow nanostructured NiO particles as efficient electrode material for lithium-ion energy storage properties

Young Geun Hwang, Venugopal Nulu, Arunakumari Nulu, and Keun Yong Sohn\*

Department of Nanoscience and Engineering, Center for Nano Manufacturing, Inje University, 197 Inje-ro, Gimhae, Gyeongnam-do 50834, Republic of Korea

\*Corresponding author, E-mail address: [ksohn@inje.ac.kr](mailto:ksohn@inje.ac.kr)

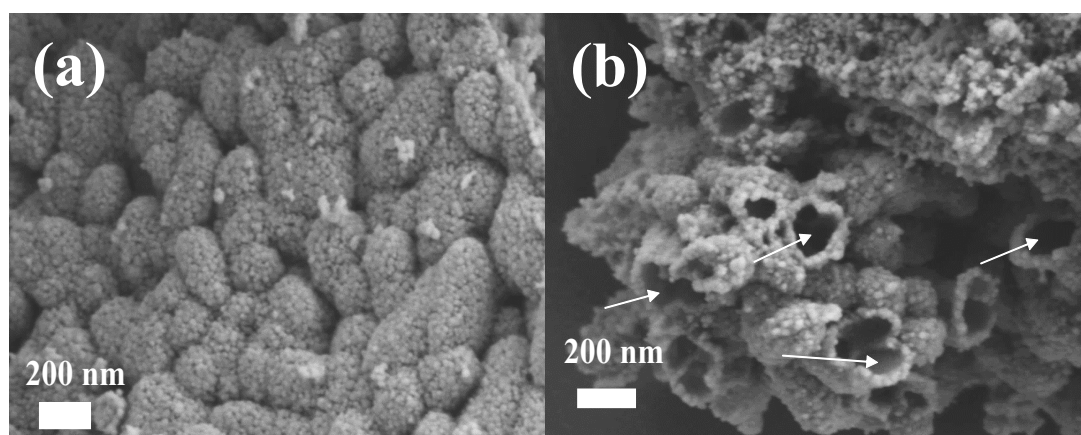

Fig. S1. a) FESEM image of h-NO hollow particles. b) shows the open mouth type partially formed hollow particles in which inner voids spaces with interior smooth nano thin-wall region of each hollow particle was witnessed (see the arrows).

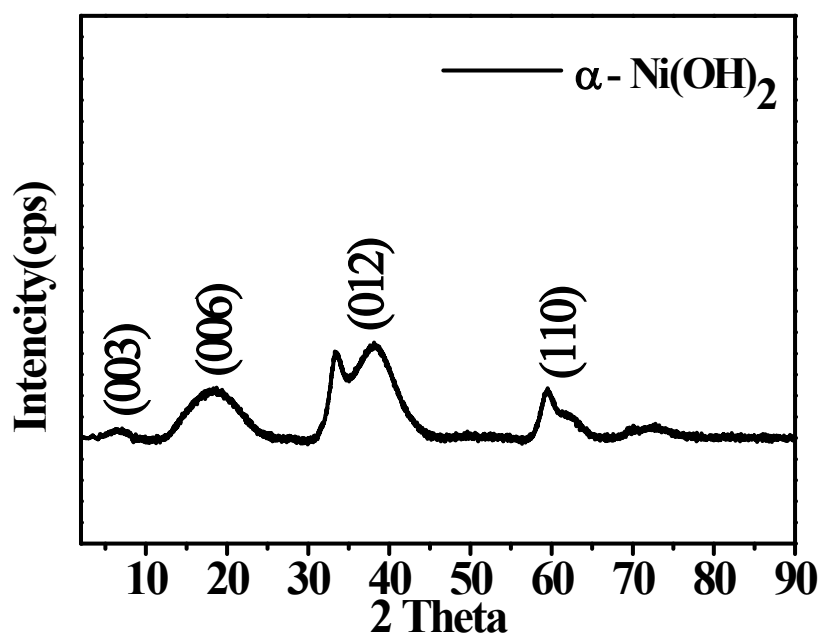

Fig. S2. XRD pattern of the as-obtained powder before being subjected to annealing treatment.

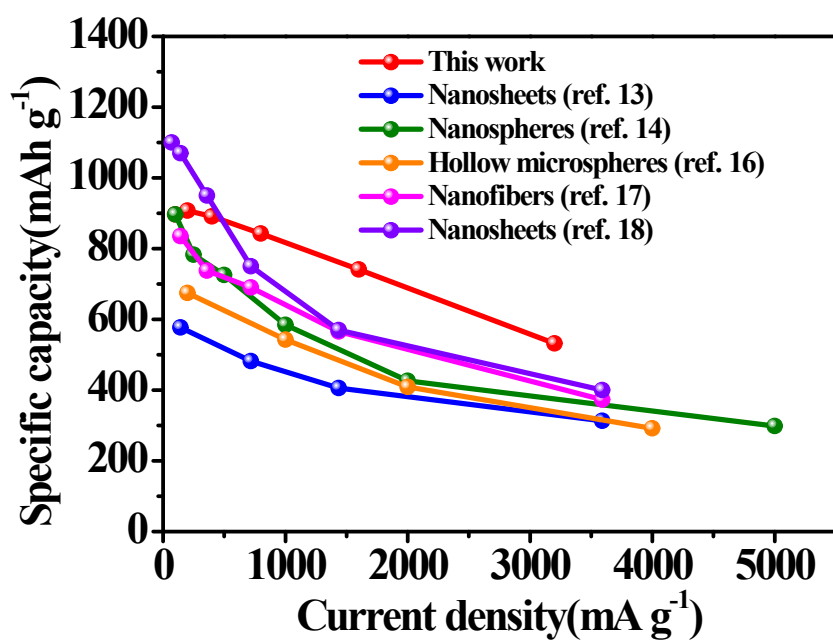

Fig. S3. Performance comparison between our NiO hollow nanostructured anode (h-NiO) material and the recently reported different NiO nanostructured anodes for LIBs. The references are mentioned in the main manuscript.

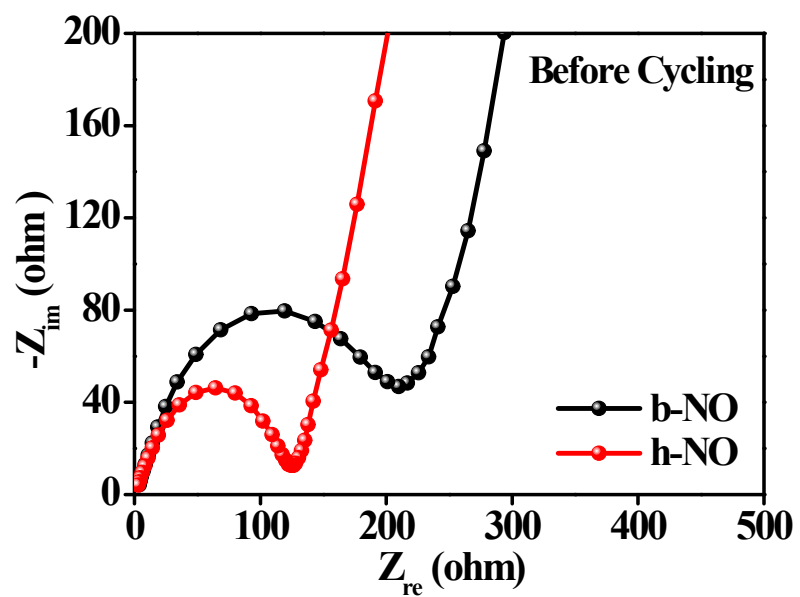

Fig. S4. Nyquist plots of the fresh h-NO and b-NO electrodes.

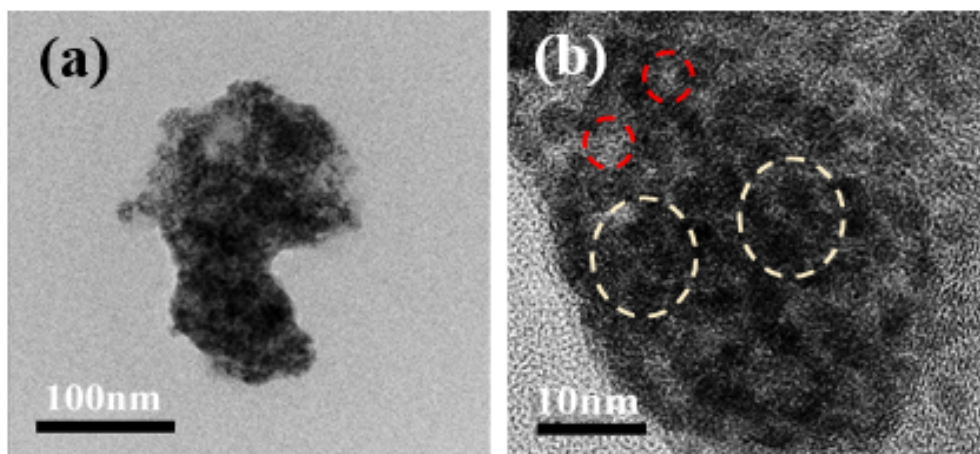

Fig. S5. TEM and HRTEM micrographs of the h-NO electrode at 200 mA hg<sup>-1</sup> after 50 cycles.

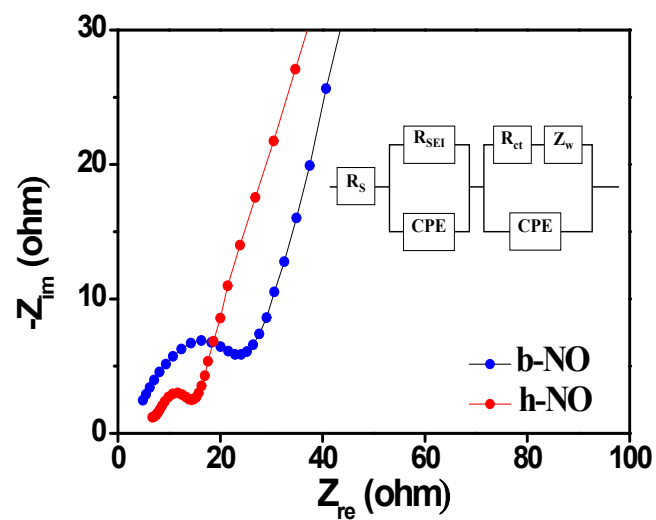

Fig. S6. EIS results (a) Nyquist plots of the h-NO and b-NO electrodes measured after six charge-discharge cycles.

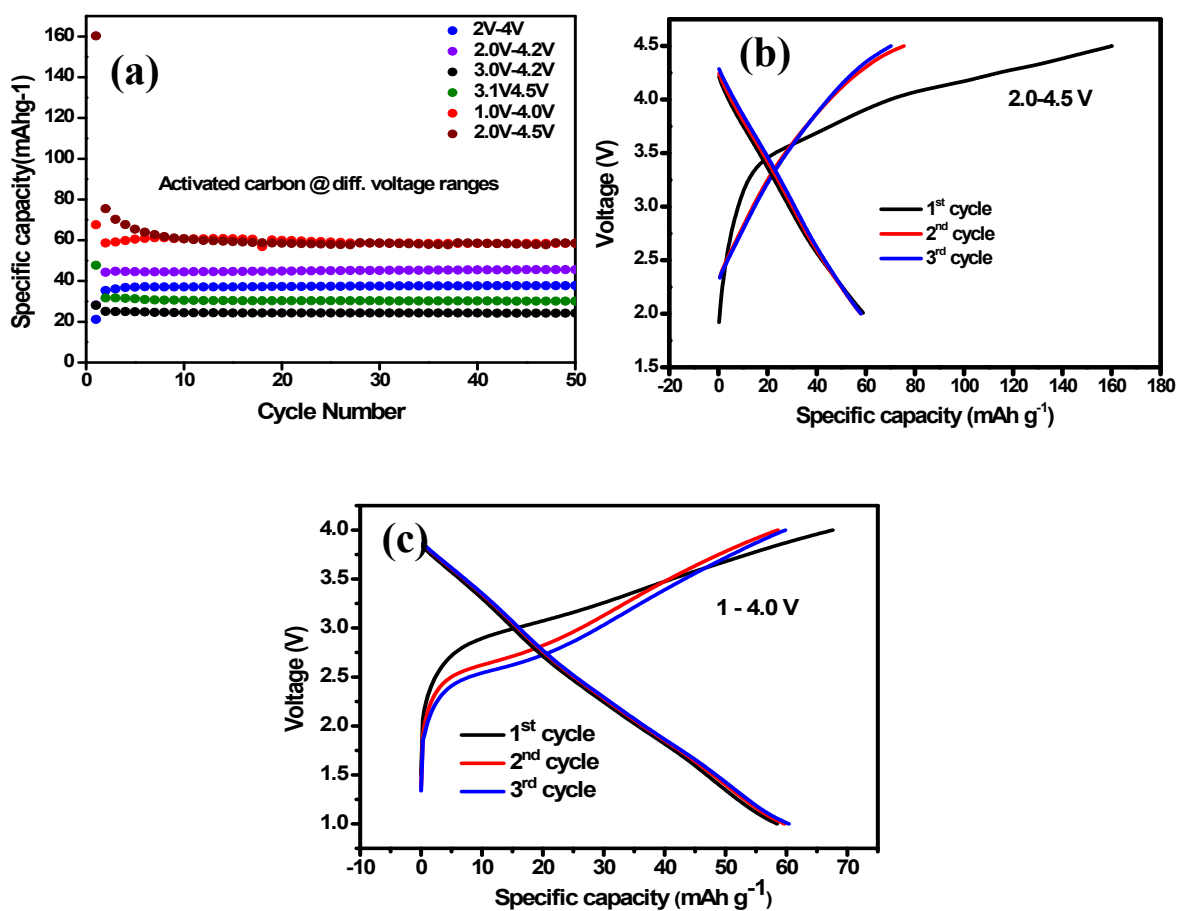

Fig. S7. (a) Cycling performance of activated carbon (AC) at different voltages at a current density of 100 mA g<sup>-1</sup>. Charge-discharge curves of AC cycled between (b) 2-4.5 V (c) 1-4.0 V.

Table 1S: Summarized circuit (shown in the inset of Fig. S6) parameters values

| Material | $R_s$<br>(ohm) | $R_{SEI}$<br>(ohm) | $R_{ct}$<br>(ohm) |
|----------|----------------|--------------------|-------------------|
| h-NO     | 6.4            | 10.85              | 16.2              |
| b-NO     | 4.7            | 14.5               | 36.6              |
